# Supplementary material for: The male-heterogametic sex determination system on chromosome 15 of Salix arbutifolia and Salix triandra reveals ancestral male heterogamety and subsequent turnover events in the genus Salix
Source: Research Square preprint supplement (doi:10.21203/rs.3.rs-2064833/v1), 2022-09-28
Supplement: Supplementary file 1 [file ec8664affe9de50e618f76ec.xlsx]

## Sheet: Table S1
ID	Time	Sampling location	Latitude	Longitude	Growing environment	Gender	Altitude (m)	Collector
Salix arbutifolia
FB105649	2021-06-06 15:20:00	Amur Forestry Bureau, Mohe City, Daxinganling Region, Heilongjiang Province, China	52.8348395	123.1632497	riverside	Female	210m	Yi Wang
FB105649 A	2021-06-06 15:49:00	Amur Forestry Bureau, Mohe City, Daxinganling Region, Heilongjiang Province, China	52.8346397	123.1632849	riverside	Male	210m	Yi Wang
FB105649 B	2021-06-06 15:49:00	Amur Forestry Bureau, Mohe City, Daxinganling Region, Heilongjiang Province, China	52.8346397	123.1632849	riverside	Male	210m	Yi Wang
FB105649 D	2021-06-06 15:50:00	Amur Forestry Bureau, Mohe City, Daxinganling Region, Heilongjiang Province, China	52.8346397	123.1632849	riverside	Female	210m	Yi Wang
FB105649 E	2021-06-06 15:50:00	Amur Forestry Bureau, Mohe City, Daxinganling Region, Heilongjiang Province, China	52.8346397	123.1632849	riverside	Male	210m	Yi Wang
FB105649 F	2021-06-06 16:00:00	Amur Forestry Bureau, Mohe City, Daxinganling Region, Heilongjiang Province, China	52.8346345	123.1632197	riverside	Female	210m	Yi Wang
FB105649 G	2021-06-06 16:07:00	Amur Forestry Bureau, Mohe City, Daxinganling Region, Heilongjiang Province, China	52.8345097	123.1632699	riverside	Female	210m	Yi Wang
FB105649 H	2021-06-06 16:14:00	Amur Forestry Bureau, Mohe City, Daxinganling Region, Heilongjiang Province, China	52.8341847	123.1631797	riverside	Female	210m	Yi Wang
FB105649 I	2021-06-06 16:55:00	Amur Forestry Bureau, Mohe City, Daxinganling Region, Heilongjiang Province, China	52.8319273	123.1567865	riverside	Male	210m	Yi Wang
FB105649 K	2021-06-06 16:56:00	Amur Forestry Bureau, Mohe City, Daxinganling Region, Heilongjiang Province, China	52.8319273	123.1567865	riverside	Male	210m	Yi Wang
FB105649 L	2021-06-06 16:56:00	Amur Forestry Bureau, Mohe City, Daxinganling Region, Heilongjiang Province, China	52.8319273	123.1567865	riverside	Male	210m	Yi Wang
FB105649 M	2021-06-06 18:29:00	Amur Forestry Bureau, Mohe City, Daxinganling Region, Heilongjiang Province, China	52.8320571	123.1572775	riverside	Male	210m	Yi Wang
FB105649 N	2021-06-06 18:31:00	Amur Forestry Bureau, Mohe City, Daxinganling Region, Heilongjiang Province, China	52.8320232	123.1573176	riverside	Male	210m	Yi Wang
FB105649 O	2021-06-06 18:31:00	Amur Forestry Bureau, Mohe City, Daxinganling Region, Heilongjiang Province, China	52.8320232	123.1573176	riverside	Female	210m	Yi Wang
FB105649 P	2021-06-06 18:31:00	Amur Forestry Bureau, Mohe City, Daxinganling Region, Heilongjiang Province, China	52.8320232	123.1573176	riverside	Male	210m	Yi Wang
FB105649 Q	2021-06-06 18:32:00	Amur Forestry Bureau, Mohe City, Daxinganling Region, Heilongjiang Province, China	52.8320232	123.1573176	riverside	Male	210m	Yi Wang
FB105649 R	2021-06-06 18:30:00	Amur Forestry Bureau, Mohe City, Daxinganling Region, Heilongjiang Province, China	52.8320571	123.1572775	riverside	Female	210m	Yi Wang
FB105649 S	2021-06-06 18:27:00	Amur Forestry Bureau, Mohe City, Daxinganling Region, Heilongjiang Province, China	52.8320272	123.1573176	riverside	Female	210m	Yi Wang
FB105649 T	2021-06-06 18:25:00	Amur Forestry Bureau, Mohe City, Daxinganling Region, Heilongjiang Province, China	52.8320423	123.1573477	riverside	Male	210m	Yi Wang
FB105649 V	2021-06-06 18:27:00	Amur Forestry Bureau, Mohe City, Daxinganling Region, Heilongjiang Province, China	52.8320272	123.1573176	riverside	Female	210m	Yi Wang
FB105649 U	2021-06-06 18:30:00	Amur Forestry Bureau, Mohe City, Daxinganling Region, Heilongjiang Province, China	52.8320232	123.1573176	riverside	Male	210m	Yi Wang
FB105649 W	2021-06-06 18:25:00	Amur Forestry Bureau, Mohe City, Daxinganling Region, Heilongjiang Province, China	52.8320272	123.1573176	riverside	Female	210m	Yi Wang
FB105649 X	2021-06-06 18:29:00	Amur Forestry Bureau, Mohe City, Daxinganling Region, Heilongjiang Province, China	52.8320571	123.1572775	riverside	Female	210m	Yi Wang
FB105649 Y	2021-06-06 18:28:00	Amur Forestry Bureau, Mohe City, Daxinganling Region, Heilongjiang Province, China	52.8320272	123.1573176	riverside	Male	210m	Yi Wang
FB105649 Z	2021-06-06 18:27:00	Amur Forestry Bureau, Mohe City, Daxinganling Region, Heilongjiang Province, China	52.8320272	123.1573176	riverside	Male	210m	Yi Wang
FB105649 AB	2021-06-06 18:28:00	Amur Forestry Bureau, Mohe City, Daxinganling Region, Heilongjiang Province, China	52.8320272	123.1573176	riverside	Male	210m	Yi Wang
FB105649 AC	2021-06-06 19:49:00	Amur Forestry Bureau, Mohe City, Daxinganling Region, Heilongjiang Province, China	52.8320092	123.1567665	riverside	Male	210m	Yi Wang
FB105649 AF	2021-06-06 19:50:00	Amur Forestry Bureau, Mohe City, Daxinganling Region, Heilongjiang Province, China	52.8320092	123.1567665	riverside	Male	210m	Yi Wang
FB105649 AG	2021-06-06 19:50:00	Amur Forestry Bureau, Mohe City, Daxinganling Region, Heilongjiang Province, China	52.8320092	123.1567665	riverside	Male	210m	Yi Wang
FB105649 AH	2021-06-06 19:49:00	Amur Forestry Bureau, Mohe City, Daxinganling Region, Heilongjiang Province, China	52.8320092	123.1567665	riverside	Female	210m	Yi Wang
FB105649 AJ	2021-06-09 12:37:00	Amur Forestry Bureau, Mohe City, Daxinganling Region, Heilongjiang Province, China	51.7528205	123.5638170	riverside	Female	210m	Yi Wang
FB105649 AK	2021-06-09 12:56:00	Amur Forestry Bureau, Mohe City, Daxinganling Region, Heilongjiang Province, China	51.7520323	123.5637671	riverside	Female	210m	Yi Wang
FB105649 AL	2021-06-09 13:06:00	Amur Forestry Bureau, Mohe City, Daxinganling Region, Heilongjiang Province, China	51.7521601	123.5635467	riverside	Female	210m	Yi Wang
FB105649 AM	2021-06-09 13:06:00	Amur Forestry Bureau, Mohe City, Daxinganling Region, Heilongjiang Province, China	51.7521601	123.5635467	riverside	Female	210m	Yi Wang
FB105649 AN	2021-06-09 13:06:00	Amur Forestry Bureau, Mohe City, Daxinganling Region, Heilongjiang Province, China	51.7521601	123.5635467	riverside	Male	210m	Yi Wang
FB105649 AP	2021-06-09 13:06:00	Amur Forestry Bureau, Mohe City, Daxinganling Region, Heilongjiang Province, China	51.7521601	123.5635467	riverside	Female	210m	Yi Wang
FB105649 BA	2021-06-09 13:06:00	Amur Forestry Bureau, Mohe City, Daxinganling Region, Heilongjiang Province, China	51.7521601	123.5635467	riverside	Female	210m	Yi Wang
FB105649 BC	2021-06-09 13:06:00	Amur Forestry Bureau, Mohe City, Daxinganling Region, Heilongjiang Province, China	51.7521601	123.5635467	riverside	Female	210m	Yi Wang
FB105649 BD	2021-06-09 13:06:00	Amur Forestry Bureau, Mohe City, Daxinganling Region, Heilongjiang Province, China	51.7521601	123.5635467	riverside	Female	210m	Yi Wang
FB105649 BE	2021-06-09 13:06:00	Amur Forestry Bureau, Mohe City, Daxinganling Region, Heilongjiang Province, China	51.7521601	123.5635467	riverside	Female	210m	Yi Wang
FB105649 BF	2021-06-09 13:06:00	Amur Forestry Bureau, Mohe City, Daxinganling Region, Heilongjiang Province, China	51.7521601	123.5635467	riverside	Male	210m	Yi Wang
Salix triandra
SANIS02M	2022-04-15	Tieling City, Liaoning Province, China	42.1319	123.423	riverside	Male	58m	X. B. Shang
SANIS03M	2022-04-15	Tieling City, Liaoning Province, China	42.1319	123.423	riverside	Male	58m	X. B. Shang
SANIS04M	2022-04-15	Tieling City, Liaoning Province, China	42.1319	123.423	riverside	Male	58m	X. B. Shang
SANIS05M	2022-04-15	Tieling City, Liaoning Province, China	42.1319	123.423	riverside	Male	58m	X. B. Shang
SANIS06M	2022-04-15	Tieling City, Liaoning Province, China	42.1319	123.423	riverside	Male	58m	X. B. Shang
SANIS07M	2022-04-15	Tieling City, Liaoning Province, China	42.1319	123.423	riverside	Male	58m	X. B. Shang
SANIS08M	2022-04-15	Tieling City, Liaoning Province, China	42.1319	123.423	riverside	Male	58m	X. B. Shang
SANIS09M	2022-04-15	Tieling City, Liaoning Province, China	42.1319	123.423	riverside	Male	58m	X. B. Shang
SANIS10M	2022-04-15	Tieling City, Liaoning Province, China	42.1319	123.423	riverside	Male	58m	X. B. Shang
SANIS11M	2022-04-15	Tieling City, Liaoning Province, China	42.1319	123.423	riverside	Male	58m	X. B. Shang
SANIS12M	2022-04-15	Tieling City, Liaoning Province, China	42.1319	123.423	riverside	Male	58m	X. B. Shang
SANIS13M	2022-04-15	Tieling City, Liaoning Province, China	42.1319	123.423	riverside	Male	58m	X. B. Shang
SANIS14M	2022-04-15	Tieling City, Liaoning Province, China	42.1319	123.423	riverside	Male	58m	X. B. Shang
SANIS15M	2022-04-15	Tieling City, Liaoning Province, China	42.1319	123.423	riverside	Male	58m	X. B. Shang
SANIS16M	2022-04-15	Tieling City, Liaoning Province, China	42.1319	123.423	riverside	Male	58m	X. B. Shang
SANIS17M	2022-04-15	Tieling City, Liaoning Province, China	42.1319	123.423	riverside	Male	58m	X. B. Shang
SANIS18M	2022-04-15	Tieling City, Liaoning Province, China	42.1319	123.423	riverside	Male	58m	X. B. Shang
SANIS19M	2022-04-15	Tieling City, Liaoning Province, China	42.1319	123.423	riverside	Male	58m	X. B. Shang
SANIS20M	2022-04-15	Tieling City, Liaoning Province, China	42.1319	123.423	riverside	Male	58m	X. B. Shang
SANIS01F	2022-04-15	Tieling City, Liaoning Province, China	42.1319	123.423	riverside	Female	58m	X. B. Shang
SANIS02F	2022-04-15	Tieling City, Liaoning Province, China	42.1319	123.423	riverside	Female	58m	X. B. Shang
SANIS03F	2022-04-15	Tieling City, Liaoning Province, China	42.1319	123.423	riverside	Female	58m	X. B. Shang
SANIS04F	2022-04-15	Tieling City, Liaoning Province, China	42.1319	123.423	riverside	Female	58m	X. B. Shang
SANIS05F	2022-04-15	Tieling City, Liaoning Province, China	42.1319	123.423	riverside	Female	58m	X. B. Shang
SANIS06F	2022-04-15	Tieling City, Liaoning Province, China	42.1319	123.423	riverside	Female	58m	X. B. Shang
SANIS07F	2022-04-15	Tieling City, Liaoning Province, China	42.1319	123.423	riverside	Female	58m	X. B. Shang
SANIS08F	2022-04-15	Tieling City, Liaoning Province, China	42.1319	123.423	riverside	Female	58m	X. B. Shang
SANIS09F	2022-04-15	Tieling City, Liaoning Province, China	42.1319	123.423	riverside	Female	58m	X. B. Shang
SANIS10F	2022-04-15	Tieling City, Liaoning Province, China	42.1319	123.423	riverside	Female	58m	X. B. Shang
SANIS11F	2022-04-15	Tieling City, Liaoning Province, China	42.1319	123.423	riverside	Female	58m	X. B. Shang
SANIS12F	2022-04-15	Tieling City, Liaoning Province, China	42.1319	123.423	riverside	Female	58m	X. B. Shang
SANIS13F	2022-04-15	Tieling City, Liaoning Province, China	42.1319	123.423	riverside	Female	58m	X. B. Shang
SANIS14F	2022-04-15	Tieling City, Liaoning Province, China	42.1319	123.423	riverside	Female	58m	X. B. Shang
SANIS15F	2022-04-15	Tieling City, Liaoning Province, China	42.1319	123.423	riverside	Female	58m	X. B. Shang
SANIS16F	2022-04-15	Tieling City, Liaoning Province, China	42.1319	123.423	riverside	Female	58m	X. B. Shang
SANIS17F	2022-04-15	Tieling City, Liaoning Province, China	42.1319	123.423	riverside	Female	58m	X. B. Shang
SANIS18F	2022-04-15	Tieling City, Liaoning Province, China	42.1319	123.423	riverside	Female	58m	X. B. Shang
SANIS19F	2022-04-15	Tieling City, Liaoning Province, China	42.1319	123.423	riverside	Female	58m	X. B. Shang
SANIS20F	2022-04-15	Tieling City, Liaoning Province, China	42.1319	123.423	riverside	Female	58m	X. B. Shang

## Sheet: Table S2
Sample ID	Read	Raw Reads(M)	Raw Bases(G)	Raw Q20(G)	Raw Q30(G)	Clean Reads(M)	Clean Bases(G)	Clean Q20(G)	Clean Q30(G)
B649	1	30.19	4.528	4.442(98.0889%)	4.219(93.1805%)	29.935	4.46	4.386(98.3259%)	4.170(93.4930%)
	2	30.19	4.528	4.399(97.1482%)	4.187(92.4567%)	29.935	4.459	4.353(97.6232%)	4.149(93.0455%)
B649AH	1	29.523	4.429	4.293(96.9291%)	4.055(91.5655%)	29.16	4.34	4.223(97.3045%)	3.995(92.0560%)
	2	29.523	4.429	4.180(94.3783%)	3.834(86.5756%)	29.16	4.339	4.122(95.0036%)	3.789(87.3151%)
B649AJ	1	27.13	4.069	3.956(97.2014%)	3.755(92.2051%)	26.839	3.994	3.896(97.5553%)	3.701(92.6662%)
	2	27.13	4.069	3.864(94.9528%)	3.561(87.5060%)	26.839	3.993	3.814(95.5044%)	3.520(88.1616%)
B649AP	1	29.559	4.434	4.314(97.3012%)	4.106(92.6071%)	29.178	4.339	4.235(97.6224%)	4.037(93.0431%)
	2	29.559	4.434	4.229(95.3723%)	3.937(88.7946%)	29.178	4.337	4.164(96.0195%)	3.885(89.5714%)
B649F	1	24.986	3.748	3.640(97.1207%)	3.458(92.2760%)	24.59	3.663	3.573(97.5390%)	3.401(92.8427%)
	2	24.986	3.748	3.549(94.7046%)	3.284(87.6176%)	24.59	3.662	3.497(95.5096%)	3.244(88.5779%)
B649G	1	28.161	4.224	4.089(96.7918%)	3.861(91.3984%)	27.823	4.137	4.021(97.2030%)	3.803(91.9217%)
	2	28.161	4.224	4.014(95.0256%)	3.707(87.7479%)	27.823	4.136	3.956(95.6709%)	3.661(88.5132%)
B649K	1	23.861	3.579	3.459(96.6551%)	3.257(91.0125%)	23.614	3.509	3.405(97.0308%)	3.210(91.4891%)
	2	23.861	3.579	3.396(94.8821%)	3.118(87.1147%)	23.614	3.508	3.348(95.4139%)	3.078(87.7442%)
B649X	1	29.106	4.366	4.247(97.2739%)	4.035(92.4289%)	28.829	4.283	4.181(97.6185%)	3.978(92.8738%)
	2	29.106	4.366	4.171(95.528%)	3.870(88.6494%)	28.829	4.283	4.113(96.0321%)	3.822(89.2569%)
B649Y	1	37.633	5.645	5.475(96.9975%)	5.189(91.9245%)	37.226	5.543	5.396(97.3549%)	5.120(92.3809%)
	2	37.633	5.645	5.355(94.8609%)	4.937(87.4560%)	37.226	5.543	5.288(95.4270%)	4.883(88.1310%)
B649Z	1	31.465	4.72	4.595(97.3279%)	4.383(92.8655%)	31.02	4.617	4.513(97.7333%)	4.313(93.4022%)
	2	31.465	4.72	4.498(95.2902%)	4.185(88.6641%)	31.02	4.617	4.432(96.0285%)	4.133(89.5463%)
B649A	1	33.601	5.04	4.878(96.7793%)	4.585(90.9708%)	33.231	4.947	4.805(97.1235%)	4.523(91.4228%)
	2	33.601	5.04	4.792(95.0689%)	4.442(88.1355%)	33.231	4.945	4.731(95.6757%)	4.394(88.8643%)
B649AB	1	23.756	3.563	3.474(97.4932%)	3.308(91.0353%)	23.56	3.507	3.429(97.7779%)	3.269(93.2144%)
	2	23.756	3.563	3.440(96.5368%)	3.244(91.0353%)	23.56	3.507	3.401(96.9985%)	3.212(91.5982%)
B649AC	1	36.33	5.45	5.269(96.6931%)	4.949(90.8078%)	35.93	5.354	5.195(97.0355%)	4.886(91.2535%)
	2	36.33	5.45	5.198(95.393%)	4.842(88.8559%)	35.93	5.352	5.138(96.0072%)	4.795(89.5994%)
B649AF	1	31.503	4.725	4.550(96.2941%)	4.247(89.8720%)	30.958	4.614	4.460(96.6766%)	4.171(90.4027%)
	2	31.503	4.725	4.410(93.3338%)	4.022(85.1175%)	30.958	4.61	4.343(94.1977%)	3.971(86.1445%)
B649AG	1	30.433	4.565	4.399(96.3611%)	4.145(90.8103%)	29.91	4.448	4.039(96.8825%)	4.070(91.4978%)
	2	30.433	4.565	4.281(93.7866%)	3.918(85.8351%)	29.91	4.446	4.208(94.6372%)	3.862(86.8477%)
B649AK	1	23.34	3.501	3.382(96.5952%)	3.171(90.5754%)	23.058	3.434	3.330(96.9516%)	3.127(91.0464%)
	2	23.34	3.501	3.317(94.7339%)	3.065(87.5429%)	23.058	3.433	3.274(95.3907%)	3.032(88.3312%)
B649AL	1	33.694	5.054	4.885(96.6634%)	4.58(90.7247%)	33.23	4.958	4.810(97.0152%)	4.523(91.1873%)
	2	33.694	5.054	4.793(94.8324%)	4.432(87.6861%)	33.3	4.956	4.732(95.4783%)	4.384(88.4658%)
B649AM	1	32.656	4.898	4.736(96.6834%)	4.446(90.7680%)	32.29	4.809	4.667(97.0457%)	4.388(91.2416%)
	2	32.656	4.898	4.655(95.0391%)	4.317(88.1225%)	32.293	4.807	4.599(95.6748%)	4.273(88.8907%)
B649AN	1	26.144	3.922	3.798(96.8507%)	3.602(91.8555%)	25.841	3.848	3.742(97.2495%)	3.555(92.3709%)
	2	26.144	3.922	3.741(95.3908%)	3.477(88.6718%)	25.841	3.848	3.693(95.9764%)	3.439(89.3806%)
B649B	1	55.54	8.331	8.094(97.1537%)	7.670(92.0695%)	54.887	8.168	7.964(97.4916%)	7.558(92.5280%)
	2	55.54	8.331	7.947(95.3962%)	7.404(88.8688%)	54.887	8.166	7.842(96.0345%)	7.320(89.6402%)
B649BA	1	37.003	5.551	5.383(96.9722%)	5.115(92.1546%)	36.564	5.442	5.300(97.3932%)	5.044(92.6992%)
	2	37.004	5.551	5.289(95.2813%)	4.906(88.3925%)	36.564	5.441	5.217(95.8916%)	4.849(89.1301%)
B649BC	1	39.497	5.925	5.743(96.9406%)	5.450(91.9873%)	39.049	5.82	5.664(97.3213%)	5.383(92.4813%)
	2	39.497	5.925	5.622(94.9008%)	5.190(87.5979%)	39.05	5.819	5.556(95.4777%)	5.137(88.2888%)
B649BD	1	30.462	4.569	4.463(97.6684%)	4.263(93.2888%)	30.185	4.497	4.406(97.9686%)	4.213(93.6833%)
	2	30.462	4.569	4.420(96.7319%)	4.181(91.4953%)	30.185	4.496	4.373(97.2536%)	4.143(92.1327%)
B649BE	1	31.214	4.682	4.517(96.4741%)	4.256(90.9045%)	30.768	4.585	4.441(96.8577%)	4.192(91.4151%)
	2	31.214	4.682	4.415(94.2938%)	4.061(86.7232%)	30.765	4.584	4.354(94.9816%)	4.013(87.5470%)
B649BF	1	30.028	4.504	4.363(96.8540%)	4.134(91.7882%)	29.679	4.415	4.295(97.2767%)	4.077(92.3325%)
	2	30.028	4.504	4.281(95.0367%)	3.962(87.9553%)	29.679	4.414	4.222(95.6452%)	3.915(88.6854%)
B649D	1	32.731	4.91	4.749(96.7260%)	4.462(90.8813%)	32.372	4.82	4.678(97.0622%)	4.402(91.3242%)
	2	32.731	4.91	4.659(94.8866%)	4.308(87.7530%)	32.372	4.817	4.601(95.4974%)	4.263(88.4872%)
B649E	1	32.043	4.806	4.649(96.7342%)	4.369(90.8927%)	31.666	4.714	4.578(97.0991%)	4.307(91.3698%)
	2	32.043	4.806	4.567(95.0126%)	4.235(88.1169%)	31.666	4.712	4.509(95.6846%)	4.190(88.9246%)
B649H	1	39.407	5.911	5.717(96.7100%)	5.375(90.9304%)	38.923	5.797	5.629(97.1008%)	5.301(91.4407%)
	2	39.407	5.911	5.618(95.0549%)	5.216(88.2351%)	38.923	5.795	5.548(95.7454%)	5.161(89.0654%)
B649I	1	29.631	4.445	4.294(96.6222%)	4.056(91.2641%)	29.287	4.364	4.233(97.0124%)	4.004(91.7639%)
	2	29.631	4.445	4.227(95.092%)	3.917(88.1360%)	29.287	4.363	4.175(95.6938%)	3.876(88.8574%)
B649L	1	28.608	4.291	4.157(96.8829%)	3.944(91.9054%)	28.273	4.209	4.094(97.2825%)	3.889(92.4183%)
	2	28.608	4.291	4.090(95.3178%)	3.799(88.5239%)	28.273	4.2078	4.036(95.9258%)	3.756(89.2568%)
B649M	1	40.769	6.113	5.911(96.6574%)	5.546(90.6892%)	40.161	5.982	5.803(97.0155%)	5.453(91.1603%)
	2	40.769	6.115	5.782(94.5500%)	5.341(87.3323%)	40.161	5.978	5.701(95.3648%)	5.279(88.2964%)
B649N	1	26.557	3.984	3.861(96.9313%)	3.665(92.0126%)	26.293	3.918	3.812(97.3073%)	3.624(92.4935%)
	2	26.557	3.984	3.795(95.2764%)	3.518(88.3027%)	26.294	3.917	3.753(95.8117%)	3.484(88.9467%)
B649O	1	40.823	6.123	5.925(96.7637%)	5.606(91.5548%)	40.36	6.011	5.840(97.1579%)	5.533(92.0601%)
	2	40.823	6.123	5.823(95.0927%)	5.394(88.0852%)	40.36	6.01	5.749(95.6708%)	5.335(88.7785%)
B649P	1	68.917	10.337	10.118(97.8783%)	9.711(93.9418%)	68.268	10.157	9.979(98.2498%)	9.591(94.4253%)
	2	68.917	10.337	9.929(96.0505%)	9.272(89.6962%)	68.268	10.155	9.812(96.6296%)	9.178(90.3866%)
B649Q	1	35.338	5.301	5.135(96.8674%)	4.87(91.9049%)	34.941	5.208	5.066(97.2576%)	4.813(92.4076%)
	2	35.337	5.301	5.070(95.6578%)	4.729(89.2166%)	34.941	5.208	5.011(96.2179%)	4.652(89.8958%)
B649R	1	40.609	6.091	5.943(97.5579%)	5.670(93.0859%)	40.274	5.995	5.867(97.8711%)	5.605(93.4947%)
	2	40.609	6.091	5.867(96.3210%)	5.502(90.3244%)	40.274	5.993	5.803(96.8309%)	5.450(90.9408%)
B649S	1	31.435	4.715	4.564(96.7921%)	4.290(90.9897%)	31.091	4.635	4.501(97.0981%)	4.236(91.3904%)
	2	31.435	4.715	4.502(95.4868%)	4.198(89.0306%)	31.091	4.633	4.452(96.0774%)	4.158(89.7446%)
B649T	1	24.75	3.712	3.588(96.6568%)	3.389(91.2783%)	24.398	3.632	3.526(97.0743%)	3.335(91.8267%)
	2	24.75	3.712	3.483(93.8233%)	3.182(85.7248%)	24.398	3.63	3.432(94.5430%)	3.143(86.5747%)
B649U	1	36.481	5.472	5.343(97.6485%)	5.057(92.4184%)	36.174	5.394	5.282(97.9190%)	5.004(92.7723%)
	2	36.481	5.472	5.290(96.6546%)	5.000(91.3737%)	36.175	5.392	5.238(97.1351%)	4.959(91.9707%)
B649V	1	31.939	4.791	4.640(96.8449%)	4.368(91.1703%)	31.58	4.701	4.570(97.2182%)	4.309(91.6593%)
	2	31.939	4.791	4.565(95.2751%)	4.244(88.5764%)	31.58	4.699	4.507(95.9203%)	4.199(89.3542%)
B649W	1	31.322	4.698	4.530(96.4246%)	4.237(90.1751%)	30.891	4.596	4.450(96.8139%)	4.168(90.6937%)
	2	31.323	4.698	4.428(94.2403%)	4.074(86.7148%)	30.891	4.5927	4.363(94.9955%)	4.024(87.6180%)

## Sheet: Table S3
Sample ID	Read	Raw Reads(M)	Raw Bases(G)	Raw Q20(G)	Raw Q30(G)	Clean Reads(M)	Clean Bases(G)	Clean Q20(G)	Clean Q30(G)
SANIS02M	1	36.0566	5.40849	5.224286673(96.5943%)	4.941588752(91.3673%)	35.5965	5.30472	5.148358436(97.0524%)	4.878089059(91.9575%)
	2	36.0566	5.40849	5.148359558(95.1904%)	4.782192384(88.4202%)	35.5965	5.30315	5.083955668(95.8668%)	4.732379606(89.2372%)
SANIS03M	1	35.3685	5.30528	5.123067381(96.5655%)	4.842870510(91.284%)	34.869	5.19451	5.041224968(97.0491%)	4.774414666(91.9127%)
	2	35.3685	5.30528	5.026617981(94.7475%)	4.645312312(87.5602%)	34.869	5.19269	4.958840001(95.4966%)	4.593381413(88.4587%)
SANIS04M	1	36.1856	5.42783	5.236023728(96.4662%)	4.941704780(91.0438%)	35.7221	5.32462	5.159930937(96.907%)	4.878099750(91.614%)
	2	36.1856	5.42783	5.149274086(94.8679%)	4.769027318(87.8624%)	35.7221	5.32275	5.085796483(95.5483%)	4.720207325(88.6799%)
SANIS05M	1	36.7629	5.51444	5.323369459(96.5351%)	5.025880917(91.1404%)	36.2968	5.40782	5.244225568(96.9749%)	4.959664426(91.7129%)
	2	36.7629	5.51444	5.201570525(94.3264%)	4.782971931(86.7354%)	36.2968	5.40529	5.135894504(95.016%)	4.732699343(87.5567%)
SANIS06M	1	34.9809	5.24714	5.069558387(96.6156%)	4.793320481(91.3511%)	34.5371	5.14473	4.994318929(97.0763%)	4.730366585(91.9458%)
	2	34.9809	5.24714	4.990567948(95.1102%)	4.628975987(88.219%)	34.5371	5.14317	4.926920588(95.7954%)	4.579736283(89.045%)
SANIS07M	1	35.2313	5.2847	5.096104294(96.4313%)	4.812229906(91.0596%)	34.7109	51.6119	5.004872246(96.9712%)	4.735906791(91.7599%)
	2	35.2313	5.2847	5.000024019(94.6132%)	4.622728388(87.4738%)	34.7109	51.5915	4.923953139(95.4412%)	4.564383954(88.4717%)
SANIS08M	1	36.0867	5.41301	5.214537380(96.3334%)	4.915669445(90.8121%)	35.5856	5.29492	5.128305701(96.8534%)	4.843900452(91.4821%)
	2	36.0867	5.41301	5.123895347(94.6589%)	4.737206728(87.5152%)	35.5856	5.29291	5.051083880(95.4311%)	4.681190580(88.4426%)
SANIS09M	1	32.3868	4.85802	4.690498448(96.5517%)	4.431617539(91.2228%)	31.9809	4.76265	4.620610174(97.0176%)	4.373848021(91.8364%)
	2	32.3868	4.85802	4.620059139(95.1017%)	4.289155051(88.2902%)	31.9809	4.76133	4.563103419(95.8367%)	4.245766746(89.1718%)
SANIS10M	1	36.9193	5.5379	5.338091258(96.392%)	5.032157033(90.8677%)	36.4591	5.4298	5.258659407(96.8481%)	4.965823290(91.455%)
	2	36.9193	5.5379	5.231290478(94.4635%)	4.823070371(87.0921%)	36.4591	5.42744	5.164307574(95.1519%)	4.771555960(87.9155%)
SANIS11M	1	32.7154	4.90731	4.743010804(96.6519%)	4.490934212(91.5151%)	32.3011	4.80784	4.670000036(97.1329%)	4.430482045(92.1511%)
	2	32.7154	4.90731	4.652367507(94.8048%)	4.304817692(87.7225%)	32.3011	4.80623	4.593099533(95.5656%)	4.259971083(88.6344%)
SANIS12M	1	36.839	5.52586	5.358960088(96.9797%)	5.086889534(92.0561%)	36.4828	5.43834	5.294186729(97.3493%)	5.032537836(92.5381%)
	2	36.839	5.52586	5.297382799(95.8654%)	4.947886329(89.5406%)	36.4828	5.43721	5.241326909(96.3974%)	4.903608002(90.1862%)
SANIS13M	1	39.3316	5.89974	5.735460021(97.2155%)	5.455227047(92.4656%)	38.9672	5.8098	5.668587153(97.5694%)	5.398920479(92.9278%)
	2	39.3316	5.89974	5.633820481(95.4927%)	5.226113270(88.5821%)	38.9672	5.80829	5.576757303(96.0138%)	5.181407369(89.2072%)
SANIS14M	1	37.1651	5.57477	5.421246961(97.2462%)	5.160862536(92.5754%)	36.8527	5.49471	5.362468809(97.5933%)	5.111365374(93.0234%)
	2	37.1651	5.57477	5.354418499(96.0474%)	5.003779380(89.7577%)	36.8527	5.49374	5.302657308(96.5219%)	4.962615295(90.3323%)
SANIS15M	1	34.6078	5.19117	5.005931780(96.4316%)	4.725419409(91.028%)	34.0989	5.07712	4.922206330(96.9488%)	4.655726534(91.7002%)
	2	34.6078	5.19117	4.908919120(94.5628%)	4.529885116(87.2613%)	34.0989	5.07522	4.839620158(95.3578%)	4.477008624(88.2131%)
SANIS16M	1	35.143	5.27145	5.086529199(96.492%)	4.804203306(91.1363%)	34.6494	5.16211	5.005764851(96.9714%)	4.736710090(91.7593%)
	2	35.143	5.27145	4.988931927(94.6406%)	4.609486143(87.4425%)	34.6494	5.16013	4.922099531(95.387%)	4.558334555(88.3375%)
SANIS17M	1	35.8294	5.37441	5.183000688(96.4386%)	4.891676651(91.018%)	35.3249	5.25882	5.097962704(96.9412%)	4.820835593(91.6714%)
	2	35.8294	5.37441	5.084192338(94.6001%)	4.696900809(87.3939%)	35.3249	5.25681	5.013503953(95.3716%)	4.642739272(88.3186%)
SANIS18M	1	34.8085	5.22128	5.040863506(96.5446%)	4.766789619(91.2954%)	34.3172	5.10622	4.956405336(97.0661%)	4.696364446(91.9734%)
	2	34.8085	5.22128	4.971641948(95.2188%)	4.624976426(88.5793%)	34.3172	5.10483	4.899969308(95.987%)	4.569373129(89.5109%)
SANIS19M	1	35.4942	5.32413	5.138968399(96.5222%)	4.856504136(91.2168%)	34.9786	5.20546	5.051743783(97.0471%)	4.783776237(91.8992%)
	2	35.4942	5.32413	5.014558713(94.1855%)	4.605222969(86.4972%)	34.9786	5.20299	4.942777295(94.9988%)	4.550757491(87.4643%)
SANIS20M	1	37.0131	5.55197	5.347516899(96.3175%)	5.035369224(90.6952%)	36.5252	5.43953	5.264730609(96.7864%)	4.966350495(91.301%)
	2	37.0131	5.55197	5.234998595(94.2909%)	4.818419450(86.7876%)	36.5252	5.43709	5.166252950(95.0187%)	4.765915166(87.6556%)
SANIS01F	1	35.3797	5.30696	5.119575688(96.4691%)	4.833029988(91.0697%)	34.8835	5.18971	5.032510078(96.9709%)	4.760210249(91.7239%)
	2	35.3797	5.30696	5.015575844(94.5094%)	4.625580862(87.1607%)	34.8835	5.18759	4.943386167(95.2925%)	4.570288361(88.1004%)
SANIS02F	1	37.054	5.5581	5.358184265(96.4031%)	5.049499666(90.8494%)	36.5919	5.45087	5.278538593(96.8385%)	4.982908330(91.4149%)
	2	37.054	5.5581	5.243904443(94.347%)	4.825639105(86.8217%)	36.5919	5.44838	5.177865227(95.035%)	4.775121168(87.643%)
SANIS03F	1	36.6476	5.49714	5.300606666(96.4248%)	4.998520469(90.9295%)	36.1916	5.38833	5.220479645(96.8849%)	4.931537347(91.5226%)
	2	36.6476	5.49714	5.200526667(94.6042%)	4.802531491(87.3642%)	36.1916	5.38613	5.133487276(95.3094%)	4.751041061(88.2088%)
SANIS04F	1	36.0563	5.40844	5.218469252(96.4874%)	4.926686782(91.0925%)	35.569	5.29666	5.135259327(96.9528%)	4.856975379(91.6988%)
	2	36.0563	5.40844	5.090024940(94.1126%)	4.671538970(86.3749%)	35.569	5.29392	5.021573951(94.8555%)	4.619619567(87.2627%)
SANIS05F	1	35.6772	5.35159	5.158567112(96.3932%)	4.862967972(90.8696%)	35.2162	5.24055	5.076737248(96.8742%)	4.794525169(91.489%)
	2	35.6772	5.35159	5.068555337(94.7113%)	4.686355671(87.5695%)	35.2162	5.2385	4.999678840(95.441%)	4.633179649(88.4448%)
SANIS06F	1	36.5559	5.48338	5.290370744(96.48%)	4.992755178(91.0524%)	36.0824	5.37246	5.208579955(96.9496%)	4.924362228(91.6593%)
	2	36.5559	5.48338	5.177853974(94.4281%)	4.770211260(86.9939%)	36.0824	5.37004	5.109939697(95.1565%)	4.718349622(87.8643%)
SANIS07F	1	34.812	5.2218	5.041671197(96.5504%)	4.767214108(91.2945%)	34.3113	5.10514	4.956464654(97.0877%)	4.696193199(91.9895%)
	2	34.812	5.2218	4.947472961(94.7465%)	4.576038516(87.6334%)	34.3113	5.10319	4.876036371(95.5487%)	4.521213496(88.5958%)
SANIS08F	1	34.5685	5.18527	5.010691265(96.6332%)	4.739996103(91.4127%)	34.1329	5.08679	4.938591842(97.0866%)	4.679681238(91.9968%)
	2	34.5685	5.18527	4.941453317(95.2979%)	4.596510520(88.6456%)	34.1329	5.08536	4.880648200(95.9745%)	4.549460292(89.4619%)
SANIS09F	1	35.3705	5.30558	5.116389631(96.4341%)	4.829601546(91.0287%)	34.8925	5.19448	5.034939358(96.9286%)	4.761567115(91.6659%)
	2	35.3705	5.30558	5.040162909(94.9974%)	4.677133411(88.155%)	34.8925	5.19276	4.971208259(95.7334%)	4.623856075(89.0443%)
SANIS10F	1	35.3022	5.29533	5.112080749(96.5395%)	4.822021288(91.0618%)	34.9108	5.20111	5.042732487(96.955%)	4.764404983(91.6037%)
	2	35.3022	5.29533	5.049938038(95.3659%)	4.693193330(88.629%)	34.9108	5.20005	4.993013013(96.0186%)	4.649434424(89.4114%)
SANIS11F	1	35.5161	5.32741	5.134143820(96.3722%)	4.845040926(90.9455%)	34.9865	5.20262	5.042874401(96.9296%)	4.769057376(91.6665%)
	2	35.5161	5.32741	5.036788316(94.5447%)	4.650237598(87.2888%)	34.9865	5.20057	4.960212884(95.3783%)	4.591565315(88.2897%)
SANIS12F	1	32.8076	4.92114	4.751604785(96.555%)	4.495848981(91.3579%)	32.3509	4.81024	4.670292329(97.0906%)	4.428512840(92.0642%)
	2	32.8076	4.92114	4.648064816(94.451%)	4.284167449(87.0564%)	32.3509	4.8084	4.582665984(95.3053%)	4.234789390(88.0706%)
SANIS13F	1	35.6219	5.34328	5.150658251(96.395%)	4.859348551(90.9431%)	35.1165	5.22567	5.064573346(96.9172%)	4.787576795(91.6165%)
	2	35.6219	5.34328	5.062310309(94.7416%)	4.687934831(87.7351%)	35.1165	5.22367	4.990122255(95.529%)	4.632374314(88.6804%)
SANIS14F	1	36.4312	5.46468	5.268980426(96.4189%)	4.967438151(90.9009%)	35.967	5.3571	5.189519081(96.8717%)	4.901089962(91.4877%)
	2	36.4312	5.46468	5.154170012(94.3179%)	4.741485962(86.7661%)	35.967	5.35468	5.087832767(95.0165%)	4.690698831(87.5999%)
SANIS15F	1	35.4819	5.32228	5.131365263(96.4129%)	4.838770962(90.9153%)	35.0288	5.21116	5.049544165(96.8987%)	4.770449850(91.543%)
	2	35.4819	5.32228	5.037854047(94.6559%)	4.654797274(87.4587%)	35.0288	5.20904	4.968886785(95.3897%)	4.601636275(88.3395%)
SANIS16F	1	35.4614	5.31921	5.134976403(96.5364%)	4.852229849(91.2208%)	34.9661	5.20661	5.051205611(97.0152%)	4.782032857(91.8454%)
	2	35.4614	5.31921	5.031422461(94.5896%)	4.641279640(87.255%)	34.9661	5.20461	4.962325331(95.3448%)	4.588514055(88.1625%)
SANIS17F	1	34.9367	5.2405	5.062811930(96.6094%)	4.787272729(91.3515%)	34.435	5.13	4.980386481(97.0835%)	4.718111709(91.9709%)
	2	34.9367	5.2405	4.958176367(94.6127%)	4.576717708(87.3336%)	34.435	5.12797	4.891106260(95.3809%)	4.525839845(88.2579%)
SANIS18F	1	34.6229	5.19344	5.016270998(96.5886%)	4.743857410(91.3433%)	34.1593	5.08536	4.937492541(97.0923%)	4.678185186(91.9932%)
	2	34.6229	5.19344	4.930681713(94.9406%)	4.568904177(87.9745%)	34.1593	5.0836	4.864356040(95.6872%)	4.517830405(88.8707%)
SANIS19F	1	34.8694	5.23041	5.052678945(96.602%)	4.779214587(91.3736%)	34.3699	5.11799	4.969475386(97.0981%)	4.709596028(92.0204%)
	2	34.8694	5.23041	4.959847286(94.8271%)	4.589291744(87.7425%)	34.3699	5.11618	4.890343569(95.5859%)	4.535835525(88.6567%)
SANIS20F	1	34.9778	5.24667	5.062635818(96.4924%)	4.782790241(91.1587%)	34.4368	5.12362	4.971493480(97.0309%)	4.706757422(91.8639%)
	2	34.9778	5.24667	4.932258063(94.0075%)	4.524202497(86.23%)	34.4368	5.12109	4.857958151(94.8617%)	4.467915577(87.2453%)

## Sheet: Table S4
Sample	Mapped Reads(M)	Mapped Bases(G)	Average Depth	Coverage(%>=1X)	Coverage(%>=5X)	Duplicated Reads(%)
B649	52.855(88.3%)	6.648(74.5%)	26.2	78.6	71.2	18.7
B649A	58.306(87.7%)	7.196(72.7%)	27.9	79.1	71.5	17.6
B649AB	42.006(89.1%)	5.241(74.7%)	20.9	78.4	69.7	15.3
B649AC	63.241(88.0%)	7.859(73.4%)	30.5	79.3	72.1	18
B649AF	53.845(87.0%)	6.676(72.4%)	26.5	79.1	71.3	16.2
B649AG	53.542(89.5%)	6.840(76.9%)	26.4	79.1	71.3	15.3
B649AH	52.163(89.4%)	6.585(75.9%)	25.9	79	71.1	14.6
B649AJ	45.983(85.7%)	5.788(72.5%)	23.5	78.8	70.8	13.4
B649AK	40.014(86.8%)	4.957(72.2%)	19.5	77.8	68.9	16.8
B649AL	58.705(88.1%)	7.288(73.5%)	28	79.2	71.6	16.2
B649AM	57.099(88.4%)	7.122(74.1%)	27.7	79.2	71.7	16.9
B649AN	45.553(88.1%)	5.725(74.4%)	22.6	78.5	70.2	14.2
B649AP	50.323(86.2%)	6.276(72.3%)	25.3	78.9	71	14.9
B649B	97.833(89.1%)	12.270(75.1%)	45.4	80.6	74.2	17.9
B649BA	65.794(90.0%)	8.347(76.7%)	33	79.7	72.7	15.5
B649BC	68.566(87.8%)	8.628(74.1%)	33.6	79.7	72.6	14.6
B649BD	51.525(85.3%)	6.385(71.0%)	24.5	78.5	70.6	17.1
B649BE	54.017(87.8%)	6.800(74.2%)	27.1	79	71.3	14.1
B649BF	50.180(84.5%)	6.294(71.3%)	25	79	70.9	12.5
B649D	56.744(87.6%)	7.011(72.7%)	27.4	79.1	71.5	16.7
B649E	55.926(88.3%)	6.951(73.7%)	27.4	79.1	71.5	16.9
B649F	43.458(88.4%)	5.496(75.0%)	21.9	78.3	70	15.9
B649G	48.883(87.8%)	6.136(74.2%)	24.5	78.9	70.7	13.4
B649H	68.224(87.6%)	8.475(73.1%)	32	79.6	72.5	18.7
B649I	52.001(88.8%)	6.577(75.4%)	25.9	79.4	71.2	12.9
B649K	42.013(89.0%)	5.218(74.4%)	21.3	78.6	69.9	11
B649L	50.260(88.9%)	6.348(75.4%)	25.3	78.7	70.8	13.3
B649M	71.157(88.6%)	8.873(74.2%)	34.3	79.8	72.8	17.9
B649N	46.847(89.1%)	5.920(75.6%)	23.8	78.7	70.6	12.8
B649O	71.410(88.5%)	9.012(75.0%)	34.7	79.8	72.8	13.2
B649P	121.673(89.1%)	15.254(75.1%)	54.8	80.8	75.1	28.3
B649Q	62.633(89.6%)	7.949(76.3%)	31.4	79.5	72.3	14.9
B649R	72.426(89.9%)	9.115(76.0%)	34.6	79.4	72.7	22.3
B649S	53.778(86.5%)	6.681(72.1%)	26.3	78.8	71.1	18
B649T	43.197(88.5%)	5.439(74.9%)	21.6	78.3	69.7	13.1
B649U	61.862(85.5%)	7.747(71.8%)	29.5	79.2	71.8	16
B649V	56.013(88.7%)	6.988(74.3%)	27.6	79	71.5	18.2
B649W	54.782(88.7%)	6.818(74.2%)	26.3	78.9	71.1	17.5
B649X	51.447(89.2%)	6.423(75.0%)	25.5	78.8	71	14.2
B649Y	65.597(88.1%)	8.215(74.1%)	32	79.6	72.5	16.9
B649Z	54.443(87.8%)	6.845(74.1%)	26.7	78.9	71.3	16.9

## Sheet: Table S5
Sample	Mapped Reads(M)	Mapped Bases(G)	Average Depth	Coverage(%>=1X)	Coverage(%>=5X)	Duplicated Reads(%)
SANIS01F	57.694(82.7%)	7.180(69.2%)	23.9	76.3	67.7	26.1
SANIS02F	59.565(81.4%)	7.345(67.4%)	25.2	76.9	68.6	24
SANIS02M	58.450(82.1%)	7.231(68.2%)	25.2	77	68.9	23.9
SANIS03F	59.925(82.8%)	7.450(69.1%)	26.1	77	68.9	23.7
SANIS03M	57.784(82.9%)	7.152(68.9%)	25.1	76.8	68.7	23.6
SANIS04F	57.852(81.3%)	7.148(67.5%)	24.1	76.6	68	24.9
SANIS04M	58.317(81.6%)	7.209(67.7%)	25.2	77.2	68.7	22.9
SANIS05F	57.559(81.7%)	7.117(67.9%)	23.8	76.8	68.4	24.5
SANIS05M	59.715(82.3%)	7.393(68.4%)	25.6	77.8	69.2	23.7
SANIS06F	59.308(82.2%)	7.309(68.0%)	24.8	77	68.8	24.8
SANIS06M	57.855(83.8%)	7.235(70.3%)	25.9	76.7	68.5	23.6
SANIS07F	57.193(83.3%)	7.161(70.1%)	24.7	76.5	67.9	24
SANIS07M	57.985(83.5%)	7.340(71.1%)	24.9	76	66.6	25.9
SANIS08F	54.061(79.2%)	6.618(65.1%)	22.2	76.3	67.6	24.3
SANIS08M	59.184(83.2%)	7.437(70.2%)	26	77	68.5	23.8
SANIS09F	57.835(82.9%)	7.160(68.9%)	24.4	76.9	68.7	24.4
SANIS09M	53.617(83.8%)	6.720(70.6%)	24.1	76.6	68.1	22.3
SANIS10F	57.833(82.8%)	7.215(69.4%)	25.6	76.8	68.6	22.9
SANIS10M	61.436(84.3%)	7.683(70.8%)	27.8	77.3	69.4	23.8
SANIS11F	57.531(82.2%)	7.177(69.0%)	24.3	76.6	68	25.1
SANIS11M	54.010(83.6%)	6.749(70.2%)	23.6	76.6	68.2	22.6
SANIS12F	54.732(84.6%)	6.860(71.3%)	23.6	77.5	68.9	23.9
SANIS12M	56.266(83.0%)	7.003(69.3%)	24.4	76.6	68.3	24.8
SANIS13F	58.740(83.6%)	7.353(70.4%)	25.5	76.9	68.7	24.4
SANIS13M	58.074(83.3%)	7.235(69.8%)	24.8	77	68.7	24.2
SANIS14F	58.409(81.2%)	7.193(67.1%)	24.7	76.9	68.6	24.4
SANIS14M	59.373(85.2%)	7.454(71.8%)	26.9	77.2	69.3	22.8
SANIS15F	57.682(82.3%)	7.157(68.7%)	24.2	76.6	68.3	25.6
SANIS15M	56.985(83.6%)	7.096(69.9%)	24.8	76.9	68.6	23
SANIS16F	56.687(81.1%)	6.966(66.9%)	23.1	76.6	68.2	25.7
SANIS16M	57.301(82.7%)	7.140(69.2%)	25	77.1	68.5	23.2
SANIS17F	55.355(80.4%)	6.814(66.4%)	22.7	77	68.1	24
SANIS17M	58.967(83.5%)	7.384(70.2%)	25.7	76.7	68.3	23.3
SANIS18F	55.504(81.2%)	6.841(67.3%)	23.3	76.7	68.3	23.9
SANIS18M	58.342(85.0%)	7.409(72.6%)	26.2	76	67.1	23.6
SANIS19F	58.314(84.8%)	7.437(72.7%)	26.9	75.9	66.6	22.8
SANIS19M	58.914(84.2%)	7.396(71.1%)	26.1	77	68.8	24
SANIS20F	58.076(84.3%)	7.257(70.8%)	25.5	77.2	69	23.3
SANIS20M	61.117(83.7%)	7.627(70.1%)	27	77.6	69.4	22.9

## Sheet: Table S6
CHR	SNP	BP	A1	F_A	F_U	A2	CHISQ	P	OR
15	15:3819452	3819452	G	0.95	0	A	74.36	6.512e-18	NA
15	15:5376283	5376283	G	0.85	0	A	53.46	2.632e-13	NA
15	15:5376295	5376295	G	0.85	0	A	55.37	9.978e-14	NA
15	15:5376368	5376368	T	0.85	0	C	55.37	9.978e-14	NA
15	15:5376394	5376394	T	0.85	0	C	55.37	9.978e-14	NA
15	15:5376416	5376416	A	0.825	0	G	52.49	4.318e-13	NA
15	15:5376444	5376444	A	0.825	0	C	52.49	4.318e-13	NA
15	15:5376471	5376471	T	0.825	0	G	52.49	4.318e-13	NA
15	15:5376523	5376523	C	0.825	0	T	52.49	4.318e-13	NA
15	15:5376536	5376536	C	0.825	0	T	50.63	1.117e-12	NA
15	15:5419983	5419983	A	1	0	T	74	7.812e-18	NA
15	15:5441586	5441586	T	0.8947	0	C	61.52	4.374e-15	NA
15	15:5463855	5463855	T	0.9375	0	C	66.22	4.03e-16	NA
15	15:5463866	5463866	A	0.9375	0	T	66.22	4.03e-16	NA
15	15:5463869	5463869	T	0.8824	0	C	61.23	5.084e-15	NA
15	15:5579812	5579812	A	0.6176	0	G	35.85	2.135e-09	NA
15	15:5587658	5587658	C	0.9688	0	A	70.02	5.87e-17	NA
15	15:5611980	5611980	T	0.7353	0	C	46.02	1.17e-11	NA
15	15:5640954	5640954	A	0.575	0	T	33.56	6.894e-09	NA
15	15:5653102	5653102	T	0.8	0.05882	C	40.65	1.82e-10	64
15	15:5654277	5654277	G	0.825	0.15	A	36.47	1.548e-09	26.71
15	15:5736665	5736665	A	0.6111	0	G	35.75	2.243e-09	NA
15	15:5736762	5736762	T	0.6471	0	C	38.25	6.229e-10	NA
15	15:5859604	5859604	A	0.8333	0	T	56.88	4.644e-14	NA
15	15:5865710	5865710	C	0.9211	0	G	66.83	2.96e-16	NA
15	15:5865733	5865733	T	0.925	0	C	62.9	2.175e-15	NA
15	15:5866063	5866063	C	0.85	0	T	59.13	1.476e-14	NA
15	15:5961881	5961881	A	0.5882	0	G	33.53	7.019e-09	NA
15	15:5974148	5974148	A	0	1	G	74	7.812e-18	0
15	15:5974160	5974160	G	1	0	T	78	1.03e-18	NA
15	15:6035773	6035773	A	1	0	T	76	2.837e-18	NA
15	15:6049262	6049262	A	0.8889	0	T	63.3	1.771e-15	NA
15	15:6055605	6055605	A	0.95	0	C	70.4	4.854e-17	NA
15	15:6124430	6124430	A	0.9412	0	G	68.28	1.42e-16	NA
15	15:6124435	6124435	C	0.9375	0	T	66.22	4.03e-16	NA
15	15:6144242	6144242	T	0.6176	0	C	35.85	2.135e-09	NA
15	15:6144252	6144252	T	0.5938	0	G	33.55	6.937e-09	NA
15	15:6157489	6157489	T	0.575	0	C	33.56	6.894e-09	NA
15	15:6157492	6157492	C	0.6	0	T	35.63	2.389e-09	NA
15	15:6157494	6157494	C	0.625	0	T	37.76	7.988e-10	NA
15	15:6157958	6157958	T	0.65	0	G	39.98	2.572e-10	NA
15	15:6159606	6159606	G	0.6842	0	T	39.52	3.247e-10	NA
15	15:6179397	6179397	A	0.675	0	T	36.13	1.842e-09	NA
15	15:6317757	6317757	A	1	0	C	76	2.837e-18	NA
15	15:6317764	6317764	A	1	0	C	76	2.837e-18	NA
15	15:6317787	6317787	T	1	0	G	78	1.03e-18	NA
15	15:6317795	6317795	T	1	0	C	78	1.03e-18	NA
15	15:6317806	6317806	A	1	0	G	78	1.03e-18	NA
15	15:6317810	6317810	A	1	0	C	78	1.03e-18	NA
15	15:6317812	6317812	G	1	0	T	78	1.03e-18	NA
15	15:6317820	6317820	A	1	0	G	78	1.03e-18	NA
15	15:6339820	6339820	G	0.7632	0	T	45.18	1.798e-11	NA
15	15:6417587	6417587	T	0.6053	0	C	35.68	2.327e-09	NA
15	15:6417590	6417590	C	0.5789	0	G	33.54	6.985e-09	NA
15	15:6418294	6418294	C	0.625	0	T	36.36	1.637e-09	NA
15	15:6427623	6427623	G	0.625	0	A	33.53	7.019e-09	NA
15	15:6431700	6431700	G	0.05	0.9706	A	62.48	2.686e-15	0.001595
15	15:6431723	6431723	G	0.95	0	A	68.4	1.335e-16	NA
15	15:6431724	6431724	A	0.05	1	G	66.39	3.691e-16	0
15	15:6431728	6431728	T	0.05	1	C	66.39	3.691e-16	0
15	15:6431741	6431741	G	0.025	0.8824	A	55.5	9.366e-14	0.003419
15	15:6431770	6431770	T	0.05	1	C	66.39	3.691e-16	0
15	15:6455260	6455260	G	0.7632	0	A	48.59	3.15e-12	NA
15	15:6455283	6455283	C	0.7105	0	T	43.47	4.311e-11	NA
15	15:6455289	6455289	C	0.6842	0	T	41.05	1.482e-10	NA
15	15:6455290	6455290	G	0.6842	0	A	39.52	3.247e-10	NA
15	15:6455294	6455294	G	0.6842	0	T	41.05	1.482e-10	NA
15	15:6455297	6455297	C	0.6842	0	A	37.97	7.171e-10	NA
15	15:6455305	6455305	T	0.6579	0	C	35.77	2.223e-09	NA
15	15:6455306	6455306	G	0.6842	0	A	41.05	1.482e-10	NA
15	15:6455310	6455310	C	0.6842	0	T	37.97	7.171e-10	NA
15	15:6455312	6455312	A	0.6842	0	G	37.97	7.171e-10	NA
15	15:6455313	6455313	G	0.6842	0	T	39.52	3.247e-10	NA
15	15:6455322	6455322	C	0.6842	0	A	41.05	1.482e-10	NA
15	15:6455349	6455349	C	0.6842	0	T	39.52	3.247e-10	NA
15	15:6455362	6455362	T	0.6053	0	C	34.33	4.64e-09	NA
15	15:6455366	6455366	G	0.6053	0	A	34.33	4.64e-09	NA
15	15:6455368	6455368	A	0.6053	0	G	34.33	4.64e-09	NA
15	15:6455372	6455372	T	0.6053	0	A	34.33	4.64e-09	NA
15	15:6455380	6455380	G	0.6053	0	A	32.98	9.306e-09	NA
15	15:6455387	6455387	C	0.6053	0	T	34.33	4.64e-09	NA
15	15:6455389	6455389	A	0.6053	0	G	34.33	4.64e-09	NA
15	15:6455392	6455392	T	0.6053	0	A	32.98	9.306e-09	NA
15	15:6455404	6455404	G	0.6316	0	A	35.08	3.169e-09	NA
15	15:6456558	6456558	A	0.95	0	C	72.38	1.774e-17	NA
15	15:6456559	6456559	T	0.95	0	G	72.38	1.774e-17	NA
15	15:6456566	6456566	A	0.95	0	T	68.4	1.335e-16	NA
15	15:6456568	6456568	A	0.95	0	G	68.4	1.335e-16	NA
15	15:6456578	6456578	T	0.95	0	C	74.36	6.512e-18	NA
15	15:6456581	6456581	T	0.95	0	G	74.36	6.512e-18	NA
15	15:6496548	6496548	T	0.6111	0	G	35.75	2.243e-09	NA

## Sheet: Table S7
CHR	SNP	BP	A1	F_A	F_U	A2	CHISQ	P	OR
15	15:4163940	4163940	A	0	0.6667	T	36	1.973e-09	0
15	15:6007857	6007857	G	0.8684	0.02941	A	50.68	1.085e-12	217.8
15	15:6417892	6417892	T	0.075	0.7368	C	35.64	2.369e-09	0.02896
15	15:6423412	6423412	A	0.1053	0.9412	T	50.15	1.421e-12	0.007353
15	15:6423426	6423426	A	0.85	0.05882	T	46.05	1.153e-11	90.67

## Sheet: Table S8
Species	Sex ratio (male/female)	Male or female heterogamety	Male or female biased	References
Salix dunnii	1.21:1	male	male	Zeng et al. 2022
Salix triandra	1:1.10	male	non-significant	Yang et al. 2020
Salix arbutifolia	1.03:1	male	non-significant	Nagamitsu and Kawahara, 2002
Salix viminals	1:5	female	female	Zhai et al. 2016
Salix suchowensis	1:1.37	female	female	Yang et al. 2020
Salix purpurea	F1: 1:2.33	female	female	Gouker et al. 2020
	F2: 1:1.23
Gouker FE, Carlson CH, Zou J,Evans L,Crowell CR et al. (2020) Sexual dimorphism and sex ratio bias in the dioecious willow Salix purpurea L. bioRxiv: 2020.2004.2005.026427. https://doi.org/10.1101/2020.04.05.026427
Nagamitsu T, Kawahara T (2002). Distribution and sex ratio of Chosenia arbutifolia in the Hidaka and Kitami districts. Hokkaido. Bull. Higashi Taisetsu Mus. Nat. Hist. 24: 1-7. [In Japanese.]
Zhai F, Mao J, Liu J, Peng X, Han L et al.(2016) Male and Female Subpopulations of Salix viminalis Present High Genetic Diversity and High Long-Term Migration Rates between Them. Front Plant Sci 7: 330. https://doi.org/10.3389/fpls.2016.00330
Yang G, Xu Q, Li W, Ling J, Li X et al.(2020) Sex-Related Differences in Growth, Herbivory, and Defense of Two Salix Species. Forests 11. https://doi.org/10.3390/f11040450
